# Supplementary material for: Hydrogen evolution catalyzed by cobalt-promoted molybdenum phosphide nanoparticles
Source: Royal Society of Chemistry journal article supplement (doi:10.1039/c5cy01457c), 2015-10-30

## Supplementary Information

### S1- The EDX elemental mapping of CoMoP-0.05.

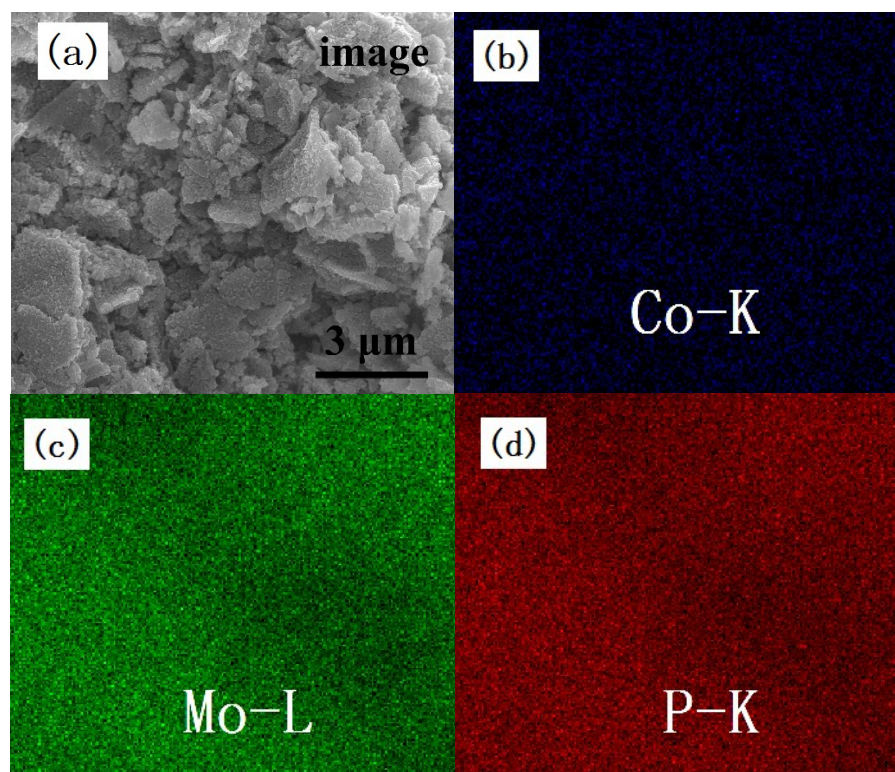

### S2- SAED pattern of CoMoP-0.05.

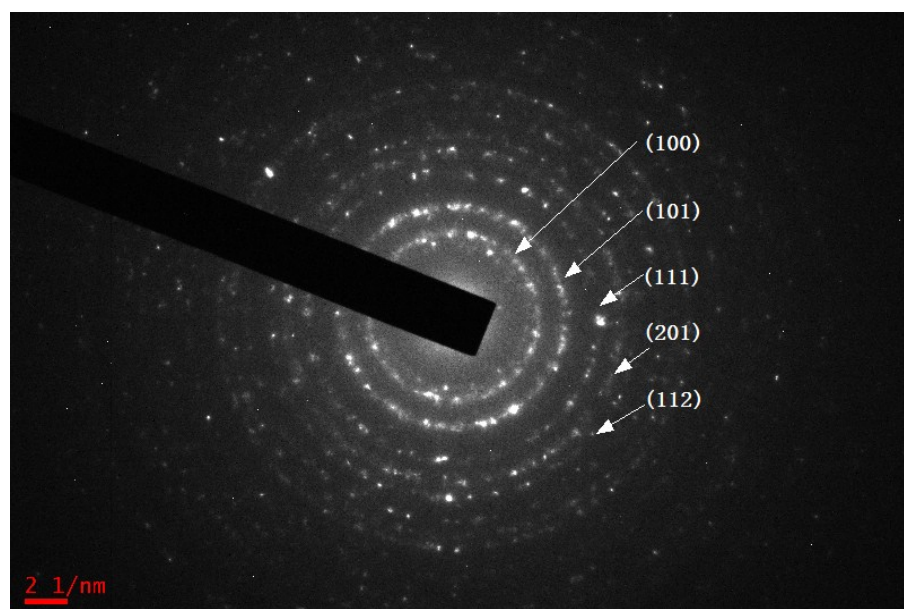

### S3- XPS of the CoMoP-0.05 and MoP: (a), (b) Survey; (c), (d) Co 2p spectrum; (e), (f) Mo 3d spectrum; (g), (h) P 2p spectrum.

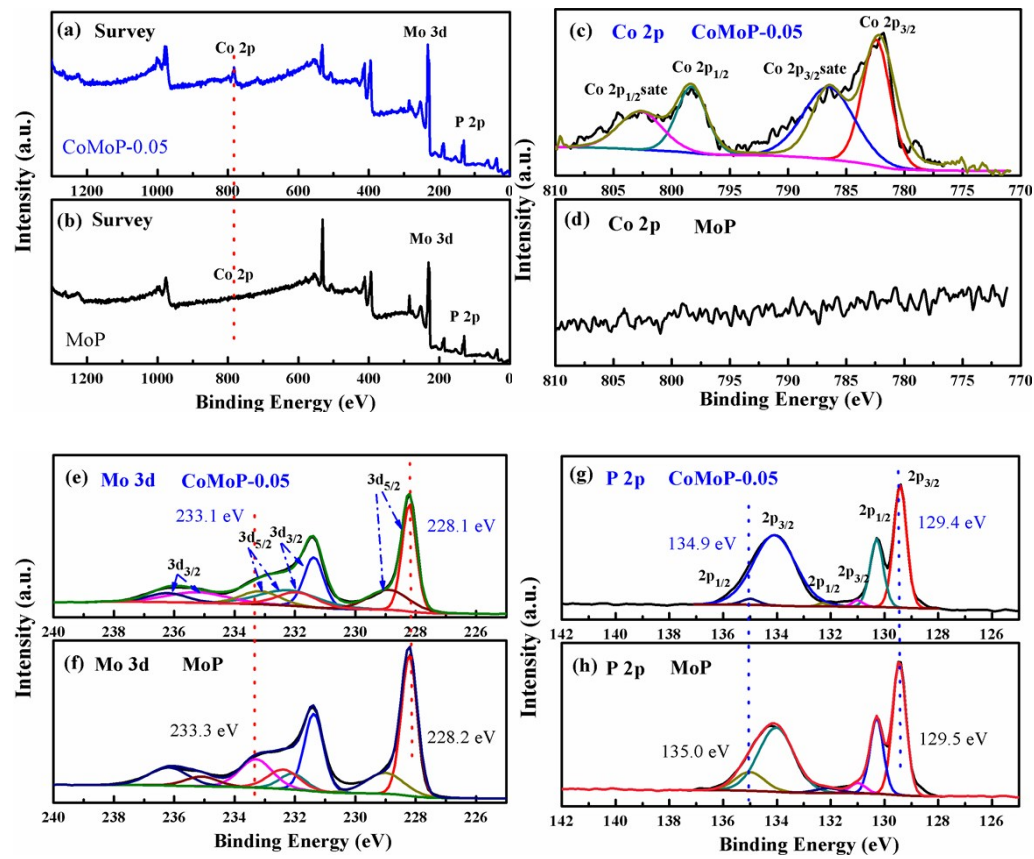

#### S4- Electrochemical capacitance measurements for the determination of the surface area of MoP and CoMoP-0.05.

(a) and (b) The capacitive current from double layer charging can be measured from cyclic voltammograms in a potential range where no Faradaic processes are observed. The capacitive currents were measured at 0.20 V vs RHE for CoMoP-0.05 (a) and at 0.27 V for MoP (b). (c) The measured capacitive currents plotted as a function of scan rate for MoP and CoMoP-0.05.

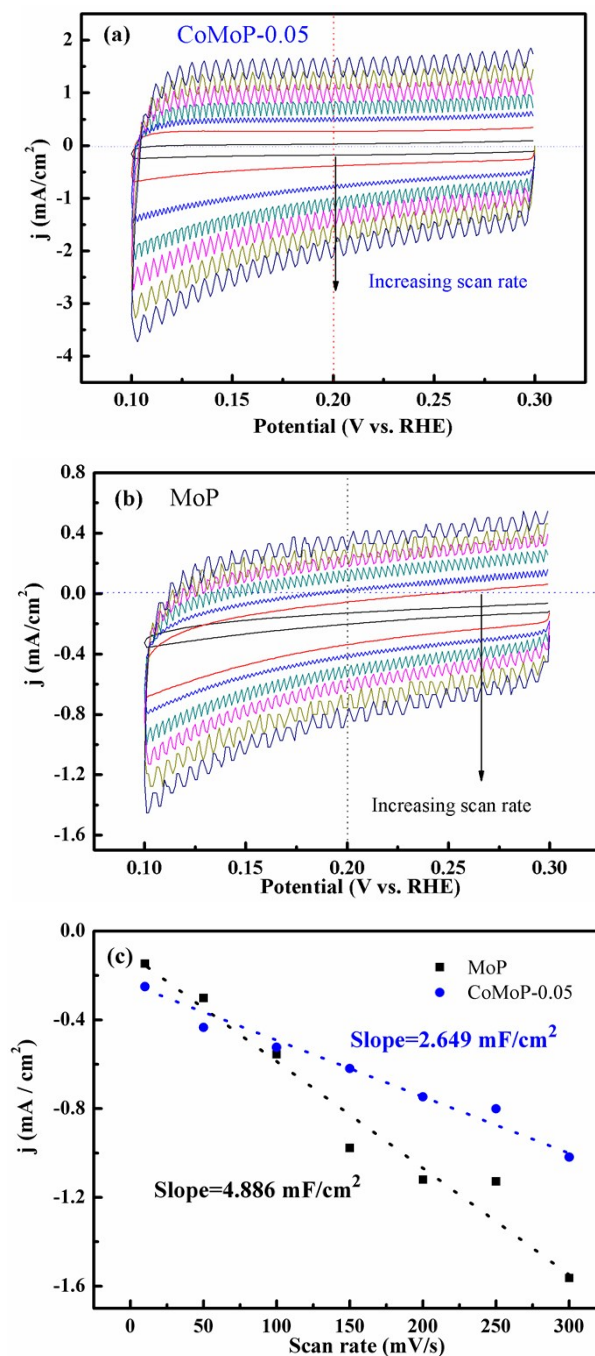

**S5- Cycling stability of CoMoP-0.05 at an overpotential of -160 mV in 0.5 M  $\text{H}_2\text{SO}_4$ .**

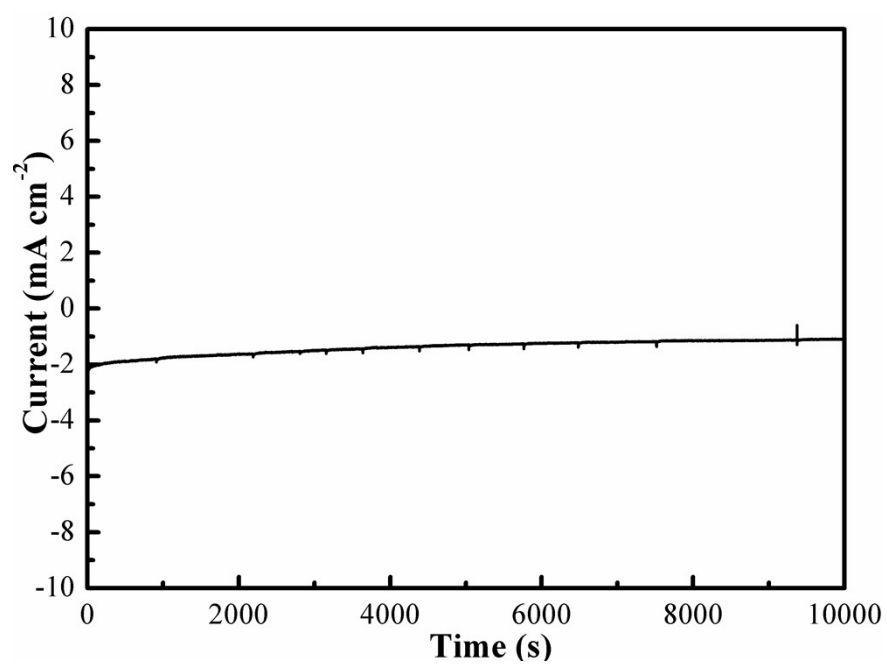

Supplement: c5cy01457c1.pdf [file c5cy01457c1.pdf]
